# Supplementary material for: Three new metal coordination polymers of bifunctional imidazolate/tetrazolate bridges: the only example of a three-dimensional framework based on rare [Co4(μ3-OH)2(μ2-Cl)2]4+ mixed oxo-chloro-clusters
Source: Royal Society of Chemistry journal article supplement (doi:10.1039/c9ra01327j), 2019-01-01
Supplement: c9ra01327j1.pdf [file c9ra01327j1.pdf]

Supporting Information for

**Three new metal coordination polymers of bifunctional imidazolate/tetrazolate  
bridges: the only example of three- dimensional framework based on rare**

**$[\text{Co}_4(\mu_3\text{-OH})_2(\mu_2\text{-Cl})_2]^{4+}$  mixed oxo-chloro-clusters**

Lili Yang, Jian Zhou, Hua-Hong Zou, and Qiuling Tang

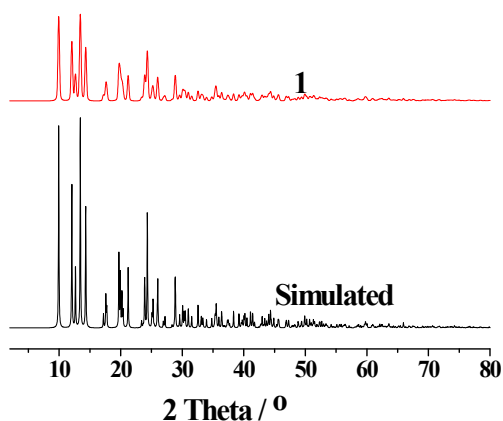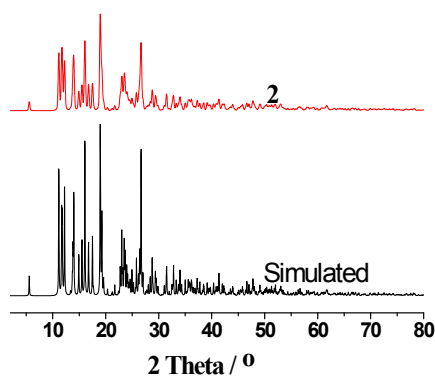

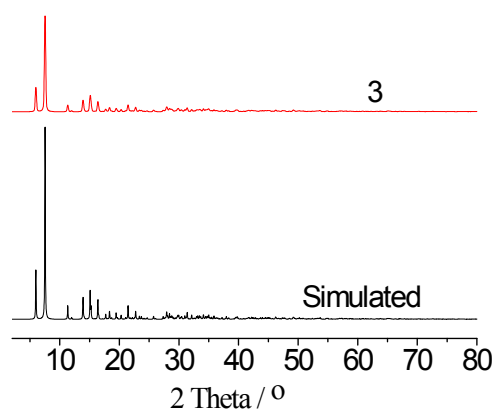

Fig. S1 Simulated and experimental powder XRD patterns of **1-3**.

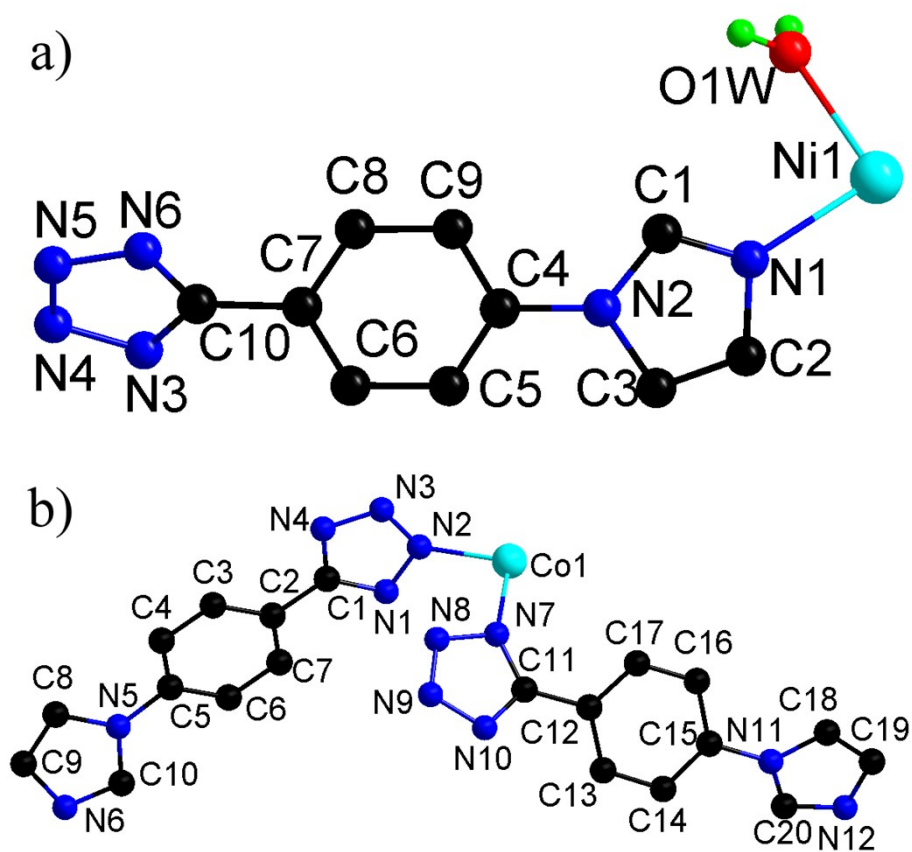

Fig. S2 The asymmetric units of **1** (a) and **2** (b) with labeling scheme. H atoms bonded to C atoms are omitted for clarity.

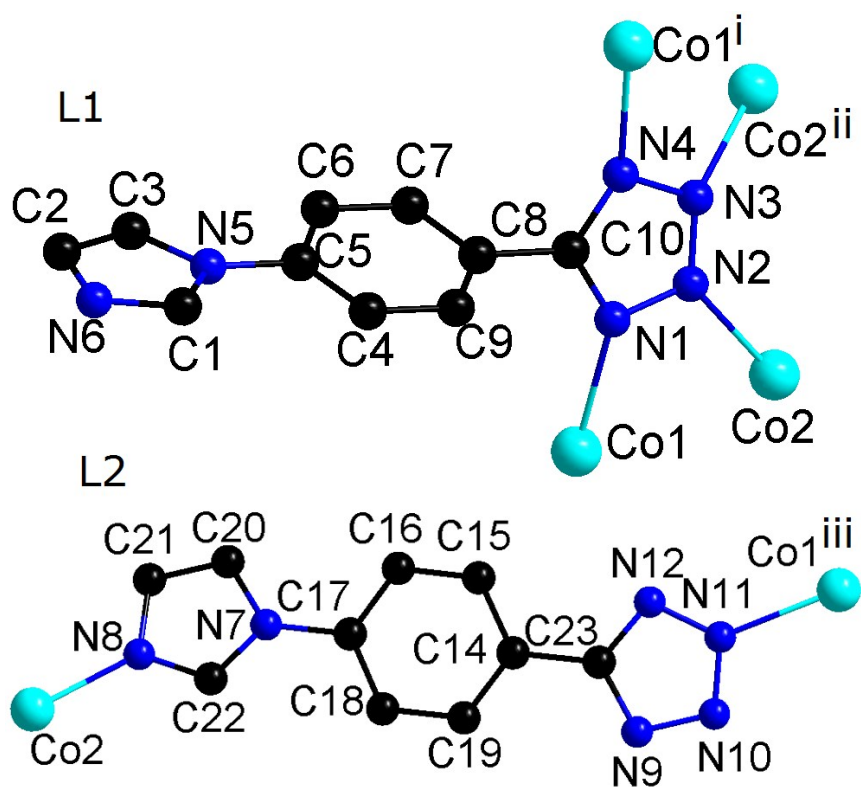

Fig. S3 The bridging modes of L- ligand in **3**. [Symmetry operation: (i)  $x, 1+y, z$ ; (ii)  $-x, 1-y, 1-z$ ; (iii)  $-0.5+x, 0.5-y, -0.5+y$ ]

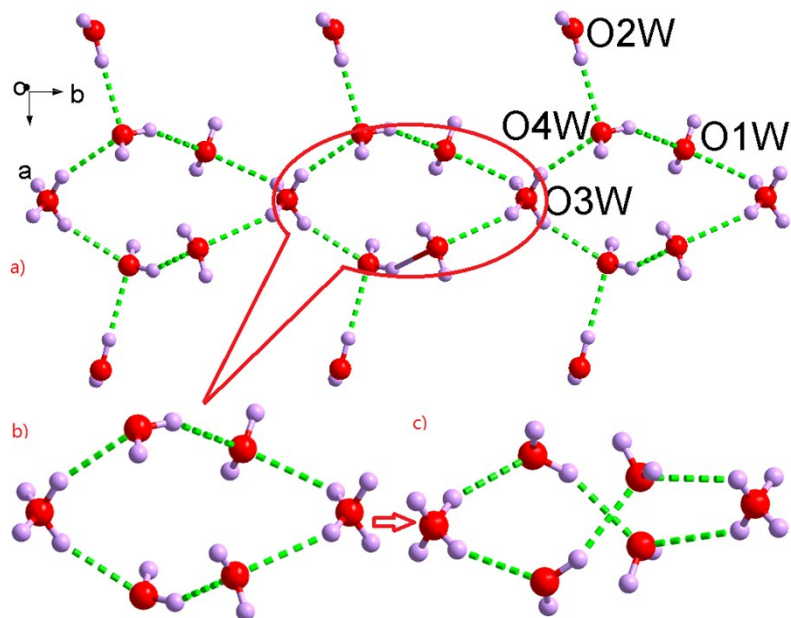

Fig. S4 a) 1-D chilopod  $[(\text{H}_2\text{O})_7]_n$  chain. The single  $(\text{H}_2\text{O})_6$  cluster unit {left, top view (b); right, side view(c)}.

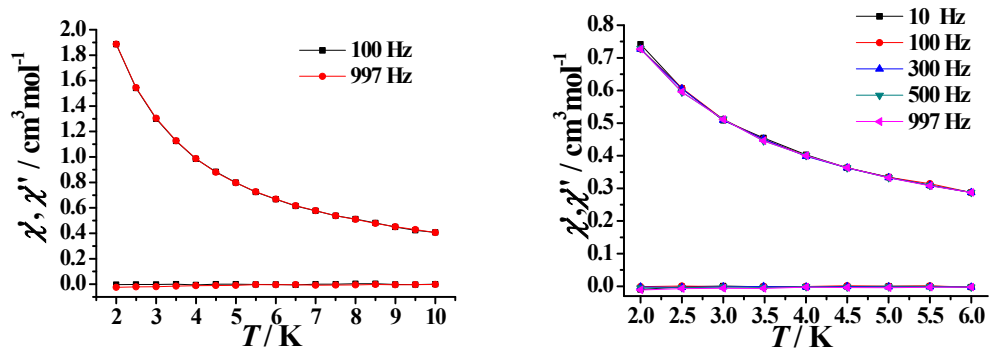

Fig. S5. Temperature dependence of in-phase and out-of-phase ac susceptibilities of **1** (left) and **2** (right) at different frequency in zero dc field and 2.5 Oe ac field.

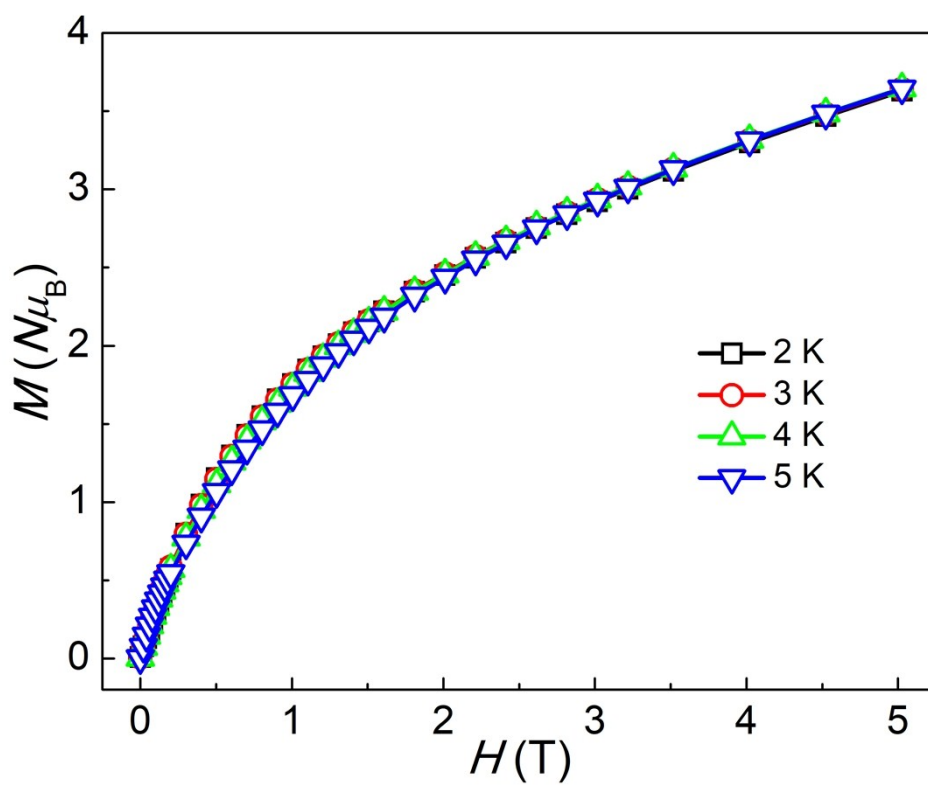

Fig. S6 The magnetization versus the dc field in the temperature range of 2–5 K for **1**.

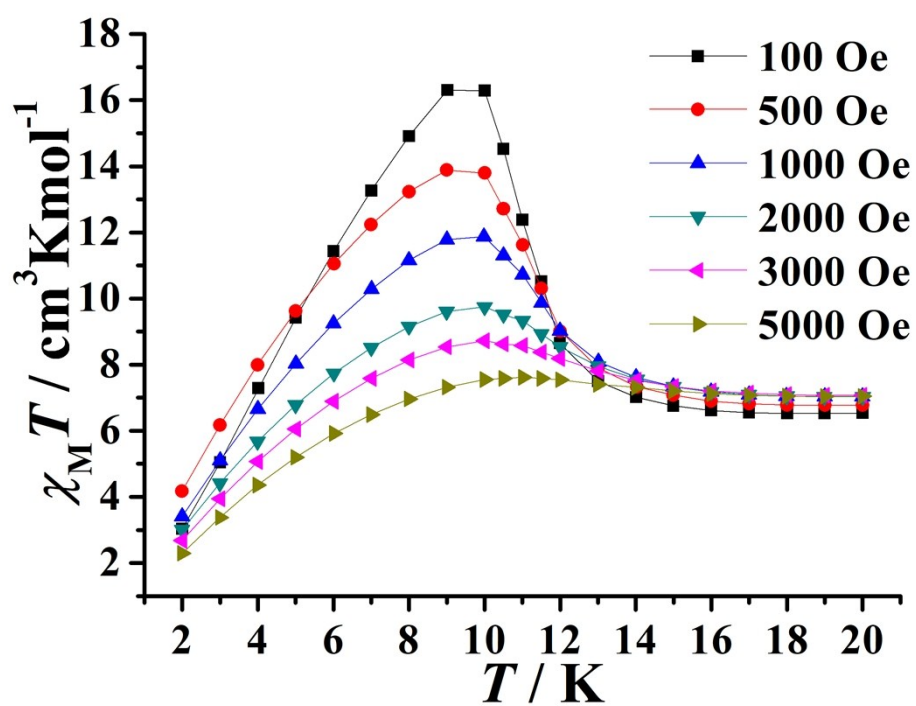

Fig. S7 Temperature dependence of the field-cooled magnetic susceptibility of **3**.
